# Supplementary material for: Highly sensitive SERS-based immunoassay with simultaneous utilization of self-assembled substrates of gold nanostars and aggregates of gold nanostars
Source: Royal Society of Chemistry journal article supplement (doi:10.1039/c3tb00519d), 2013-01-01
Supplement: c3tb00519d.pdf [file c3tb00519d.pdf]

## SUPPLEMENTARY INFORMATION

1. The determination of size of gold nanostars and length of branches. The size of gold nanostar is  $69.57 \pm 6.08 \text{ nm}$  ( $N=142$  nanoparticles) and the length of branches is  $12.96 \pm 4.44 \text{ nm}$  ( $N=609$  branches).

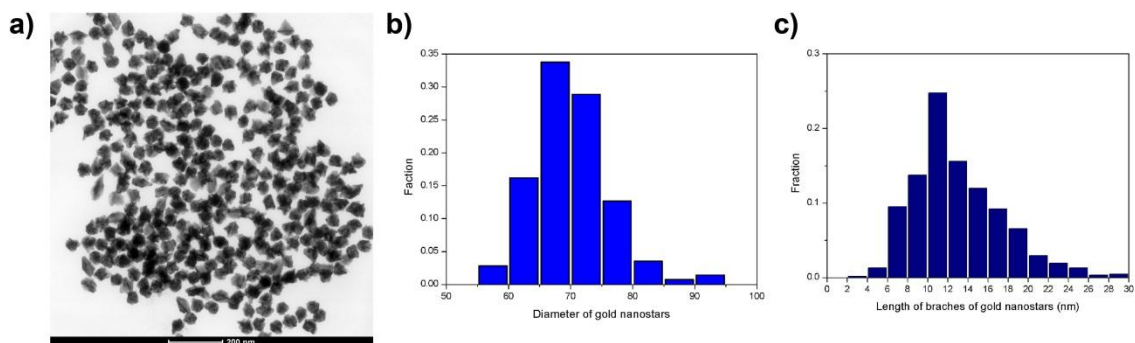

**Fig. S1** a) TEM images of gold nanostars b) histogram of the size of gold nanostars c) histogram of the length of branches of gold nanostars
